# Supplementary material for: A facile synthesis of platinum nanoparticle decorated graphene by one-step γ-ray induced reduction for high rate supercapacitors
Source: Royal Society of Chemistry journal article supplement (doi:10.1039/c2tc00078d), 2012-10-16
Supplement: c2tc00078d.pdf [file c2tc00078d.pdf]

Supplementary Material (ESI) for Journal of Materials Chemistry

**Facile synthesis of platinum nanoparticles decorated graphene by one-step  $\gamma$ -ray induced reduction for high rate supercapacitors**

Qilu Zhang<sup>a</sup>, Youwei Zhang<sup>a</sup>, Zhaohui Gao<sup>b</sup>, Hui-Ling Ma<sup>c</sup>, Shuojue Wang<sup>a</sup>, Jing Peng<sup>a</sup>,

Jiuqiang Li<sup>a</sup>, Maolin Zhai<sup>a,\*</sup>

*<sup>a</sup> Beijing National Laboratory for Molecular Sciences, Department of Applied Chemistry and the Key Laboratory of Polymer Chemistry and Physics of the Ministry of Education, College of Chemistry and Molecular Engineering, Peking University, Beijing 100871, China*

*<sup>b</sup> College of Chemical and Environmental Engineering, China University of Mining and Technology, Beijing 100083, China*

*<sup>c</sup> State Key Laboratory of Organic-Inorganic Composites, Department of Polymer Engineering, College of Materials Science and Engineering, Beijing University of Chemical Technology, Beijing 100029, China*

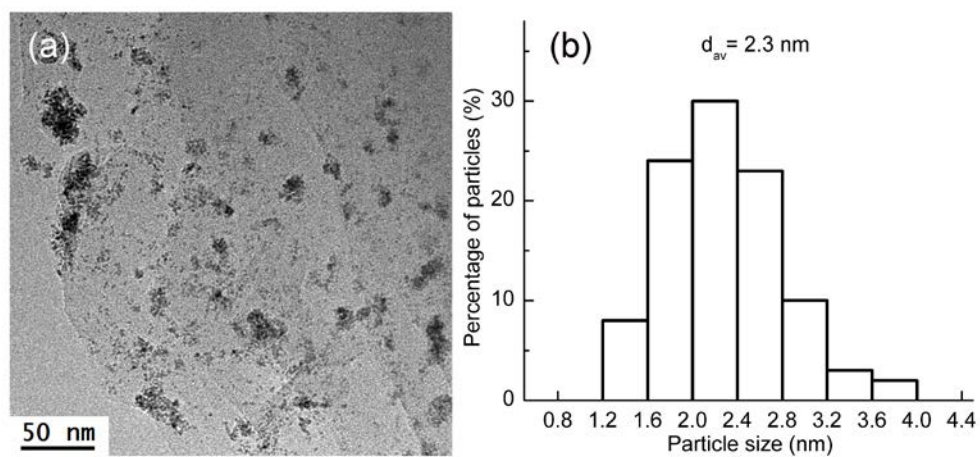

Fig. S1 (a) TEM image of PR-I; (b) particle size histograms of PtNPs in PR-I, 150 particles counted for the sample.

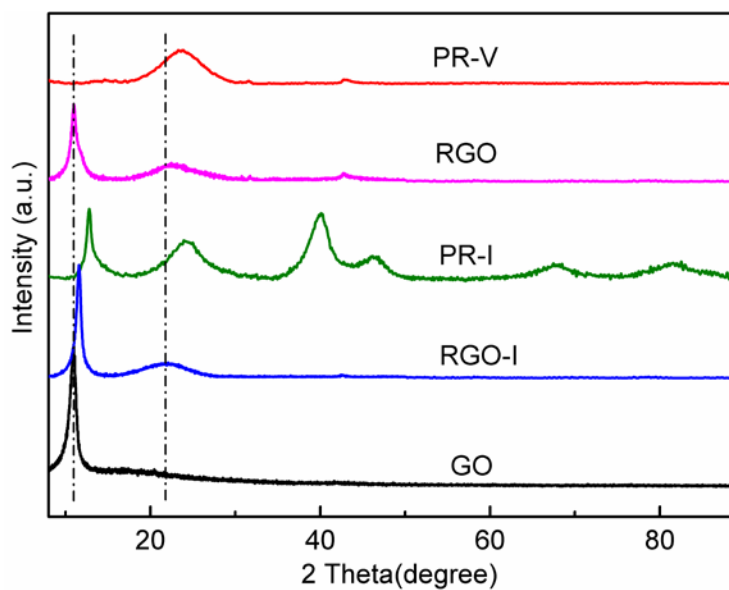

Fig. S2 XRD patterns of GO, RGO and PtNPs/RGO composites irradiated at different pH.

(RGO-I represents the RGO prepared at pH 4.5).

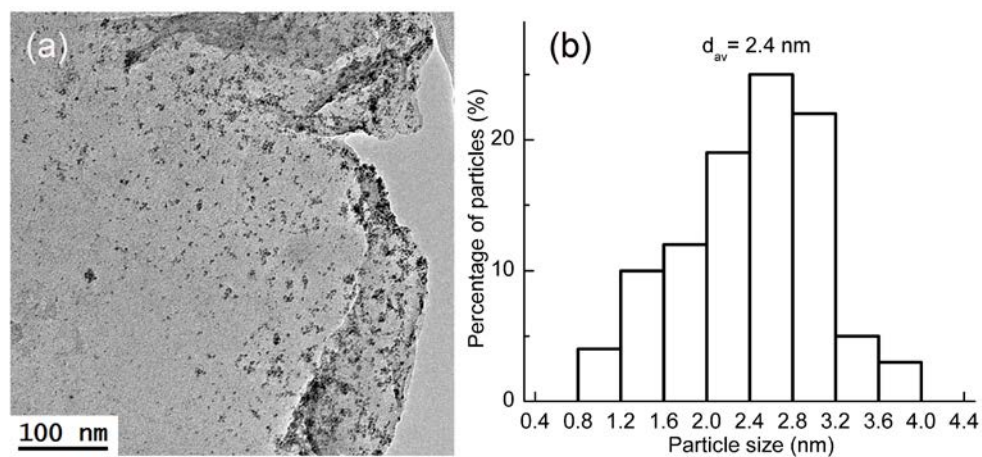

Fig. S3 (a) TEM image of PR-VI; (b) particle size histograms of PtNPs in PR-VI, 150

particles counted for the sample.

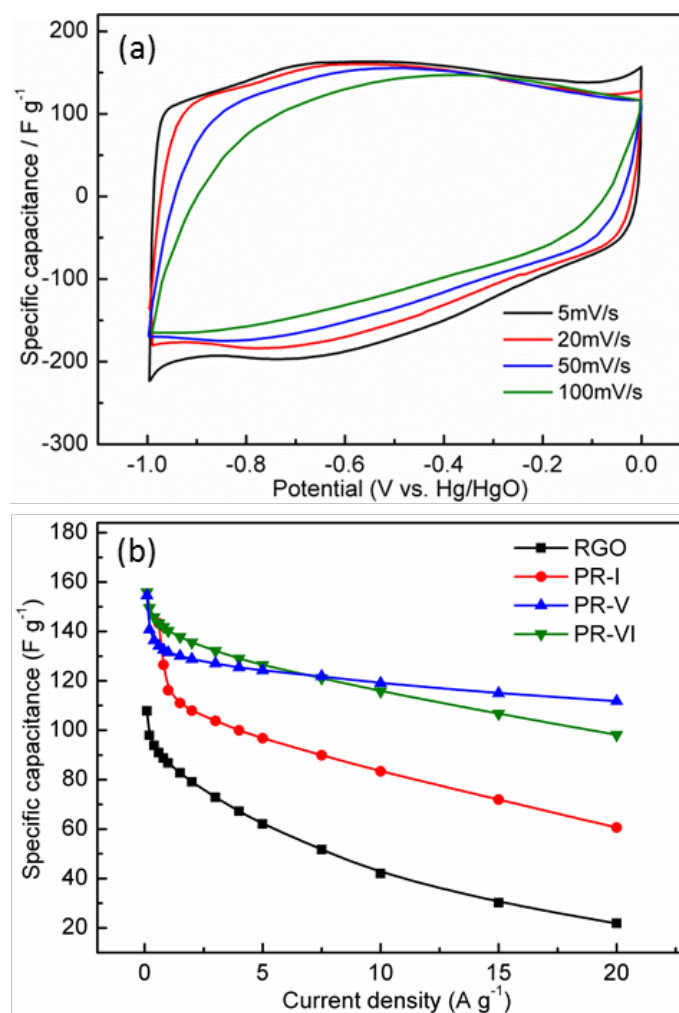

Fig. S4 (a) CV curves of PR-VI as electrodes with voltage between -1 and 0 V (vs Hg/HgO) in 6 M KOH at different scan rates; (b) Specific capacitances of RGO, PR-I, PR-V, and PR-VI electrodes as a function of discharge current density.

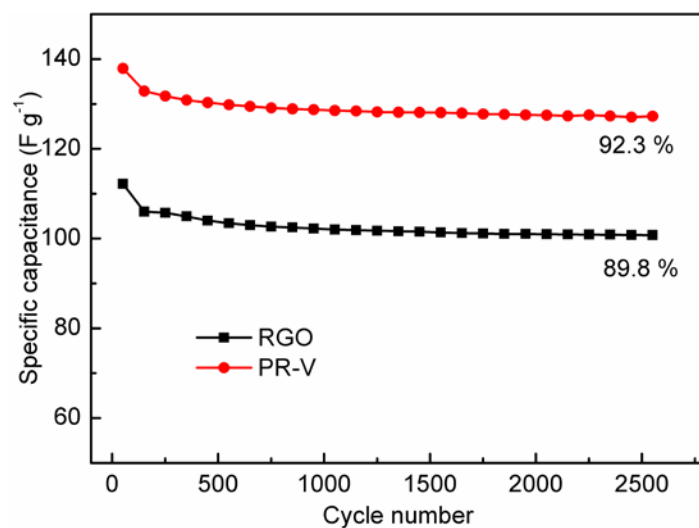

Fig. S5 Long-term cycling performance of RGO and PR-V as electrodes at a current density of  $0.6 \text{ A g}^{-1}$ .
